# Supplementary material
Source: Springer Nature journal article supplement (https://www.springermedizin.de/resource/supplementary/12981_2014_304_MOESM6_ESM.pdf/9603558)

A

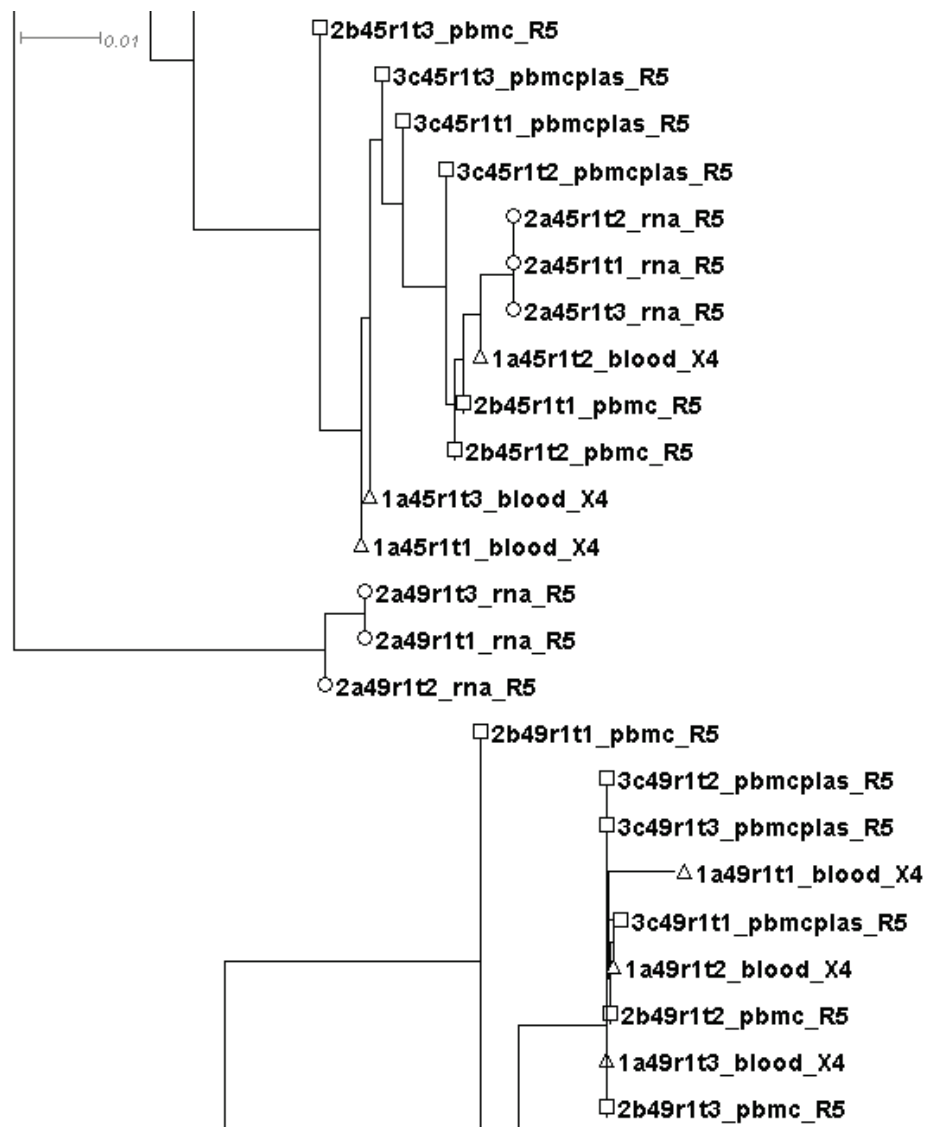

B

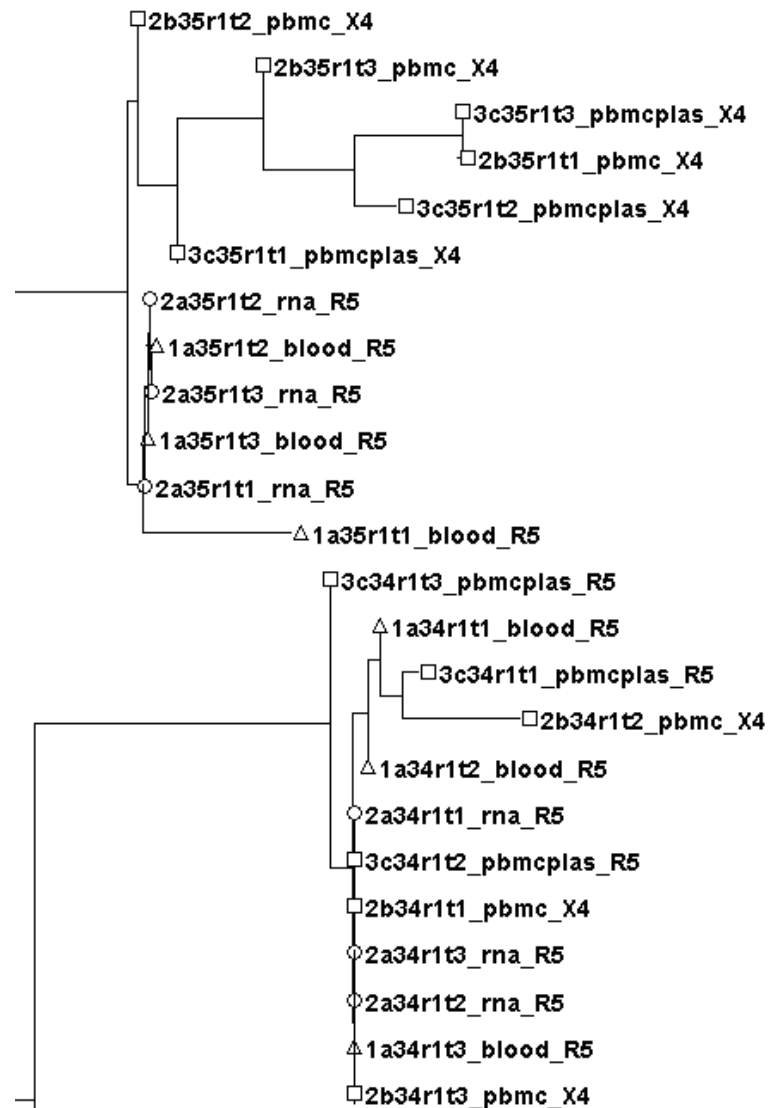

Supplement: MOESM6 [file 9603558]
